# Supplementary material for: Stabilization of small organic molecules on V2C and V2CO2 MXenes: first-principles insights into the performance of van der Waals functionals and the effect of oxygen vacancies
Source: Royal Society of Chemistry journal article supplement (doi:10.1039/d4ra06676f), 2025-01-01
Supplement: d4ra06676f1.pdf [file d4ra06676f1.pdf]

## Stabilization of small organic molecules on V<sub>2</sub>C and V<sub>2</sub>CO<sub>2</sub> MXenes: First-principles insights into the performance of van der Waals functionals and the effect of oxygen vacancies

Thong Nguyen-Minh Le,<sup>1,2,\*</sup> Thong Le Minh Pham<sup>3,4</sup> Thang Bach Phan,<sup>5,6</sup> Yoshiyuki Kawazoe,<sup>7,8,9</sup>

<sup>1</sup>Laboratory of Biophysics, Institute for Advanced Study in Technology, Ton Duc Thang University, Ho Chi Minh City, Vietnam

<sup>2</sup>Faculty of Pharmacy, Ton Duc Thang University, Ho Chi Minh City, Vietnam

<sup>3</sup>Institute of Research and Development, Duy Tan University, Da Nang 550000, Vietnam

<sup>4</sup>School of Engineering and Technology, Duy Tan University, Da Nang, 550000, Vietnam

<sup>5</sup>Center for Innovative Materials and Architectures, Ho Chi Minh City 700000, Vietnam

<sup>6</sup>Vietnam National University Ho Chi Minh City, Ho Chi Minh City 700000, Viet Nam

<sup>7</sup>New Industry Creation Hatchery Center, Tohoku University, Sendai, 980-8579, Japan

<sup>8</sup>Department of Physics and Nanotechnology, SRM Institute of Science and Technology, Kattankulathur 603203, Tamil Nadu, India

<sup>9</sup>School of Physics, Institute of Science, Suranaree University of Technology, 111 University Avenue, Nakhon Ratchasima 30000, Thailand

\*Corresponding author's email: lenguyenminhthong@tdtu.edu.vn

### S1. Geometries of adsorbed molecules

#### CH<sub>4</sub>\_V<sub>2</sub>C

Simulation cell vectors (Å):

|     |              |             |              |
|-----|--------------|-------------|--------------|
| a = | 8.612999916  | 0.000000000 | 0.000000000  |
| b = | -4.306499958 | 7.459076730 | 0.000000000  |
| c = | 0.000000000  | 0.000000000 | 21.443000794 |

Fractional coordinates

| No. | Elements | X           | Y           | Z           |
|-----|----------|-------------|-------------|-------------|
| 1   | V        | 0.111574002 | 0.222468030 | 0.102381412 |
| 2   | V        | 0.111237791 | 0.556716262 | 0.102413830 |
| 3   | V        | 0.114624689 | 0.890991601 | 0.101824247 |
| 4   | V        | 0.448264797 | 0.222061237 | 0.102283449 |
| 5   | V        | 0.447932403 | 0.557280034 | 0.105733711 |
| 6   | V        | 0.448523192 | 0.894385124 | 0.102344328 |

|    |   |             |             |             |
|----|---|-------------|-------------|-------------|
| 7  | V | 0.781091481 | 0.224378944 | 0.102151946 |
| 8  | V | 0.783160205 | 0.557003104 | 0.102397828 |
| 9  | V | 0.783096119 | 0.893848691 | 0.102433000 |
| 10 | V | 0.226823410 | 0.116281141 | 1.000754129 |
| 11 | V | 0.228220259 | 0.448248901 | 1.001888752 |
| 12 | V | 0.227053994 | 0.778006675 | 1.000758749 |
| 13 | V | 0.559746036 | 0.113624925 | 1.000269154 |
| 14 | V | 0.557826768 | 0.447785211 | 1.001670128 |
| 15 | V | 0.557348342 | 0.777310012 | 1.001894842 |
| 16 | V | 0.891868912 | 0.113411822 | 1.000313283 |
| 17 | V | 0.891811517 | 0.445884556 | 1.000307993 |
| 18 | V | 0.889075768 | 0.778343378 | 1.000819666 |
| 19 | C | 0.003439365 | 0.001937338 | 0.050819722 |
| 20 | C | 0.003396348 | 0.335472044 | 0.051116435 |
| 21 | C | 0.003406503 | 0.669102757 | 0.050687743 |
| 22 | C | 0.336193200 | 0.001964697 | 0.050468965 |
| 23 | C | 0.337007008 | 0.336170959 | 0.053497658 |
| 24 | C | 0.337054490 | 0.668449039 | 0.053866685 |
| 25 | C | 0.669975087 | 0.002006340 | 0.051205038 |
| 26 | C | 0.669864374 | 0.335513855 | 0.051219722 |
| 27 | C | 0.669187401 | 0.668383939 | 0.053628445 |
| 28 | C | 0.440739422 | 0.555706876 | 0.229548621 |
| 29 | H | 0.553220289 | 0.642322969 | 0.259518290 |
| 30 | H | 0.328179650 | 0.452964518 | 0.255899393 |
| 31 | H | 0.488431848 | 0.486274735 | 0.197462161 |
| 32 | H | 0.396619092 | 0.638747331 | 0.204648782 |

**CH<sub>4</sub>\_V<sub>2</sub>CO<sub>2</sub>**

Simulation cell vectors (Å):

|     |              |             |              |
|-----|--------------|-------------|--------------|
| a = | 8.612999916  | 0.000000000 | 0.000000000  |
| b = | -4.306499958 | 7.459076730 | 0.000000000  |
| c = | 0.000000000  | 0.000000000 | 21.443000794 |

Fractional coordinates:

| No. | Elements | X           | Y           | Z           |
|-----|----------|-------------|-------------|-------------|
| 1   | V        | 0.106802512 | 0.222248874 | 0.205469280 |
| 2   | V        | 0.106646691 | 0.555372223 | 0.205500581 |
| 3   | V        | 0.106728220 | 0.888932426 | 0.205448598 |
| 4   | V        | 0.439994684 | 0.221997460 | 0.205490905 |
| 5   | V        | 0.439792462 | 0.555313803 | 0.205361313 |

|    |   |             |              |             |
|----|---|-------------|--------------|-------------|
| 6  | V | 0.440206252 | 0.888867284  | 0.205578897 |
| 7  | V | 0.773346816 | 0.222256805  | 0.205471161 |
| 8  | V | 0.773647425 | 0.555689224  | 0.205415118 |
| 9  | V | 0.773269075 | 0.888725205  | 0.205557775 |
| 10 | V | 0.217989639 | 0.111261285  | 0.093806143 |
| 11 | V | 0.217832259 | 0.444447537  | 0.093782765 |
| 12 | V | 0.217925084 | 0.777852983  | 0.093876409 |
| 13 | V | 0.551161491 | 0.111053970  | 0.093809666 |
| 14 | V | 0.551345901 | 0.444494059  | 0.093855231 |
| 15 | V | 0.551338496 | 0.777866833  | 0.093830888 |
| 16 | V | 0.884508964 | 0.111053993  | 0.093919519 |
| 17 | V | 0.884572383 | 0.444587628  | 0.093799513 |
| 18 | V | 0.884517819 | 0.777843826  | 0.093831790 |
| 19 | C | 0.329053920 | 0.000033712  | 0.149681361 |
| 20 | C | 0.328911455 | 0.333230209  | 0.149618480 |
| 21 | C | 0.328973176 | 0.666684737  | 0.149659690 |
| 22 | C | 0.662235114 | -0.000062912 | 0.149703743 |
| 23 | C | 0.662331368 | 0.333291942  | 0.149628784 |
| 24 | C | 0.662354868 | 0.666741220  | 0.149634222 |
| 25 | C | 0.995631960 | -0.000021967 | 0.149680830 |
| 26 | C | 0.995661320 | 0.333387527  | 0.149652425 |
| 27 | C | 0.995677325 | 0.666680658  | 0.149642127 |
| 28 | C | 0.439270213 | 0.440104736  | 0.387533869 |
| 29 | O | 0.217994676 | 0.111273957  | 0.252494323 |
| 30 | O | 0.217792556 | 0.444433233  | 0.252413226 |
| 31 | O | 0.217857608 | 0.777715510  | 0.252394216 |
| 32 | O | 0.551129000 | 0.111122596  | 0.252484739 |
| 33 | O | 0.551515983 | 0.444455612  | 0.252034732 |
| 34 | O | 0.551132146 | 0.777609012  | 0.252493930 |
| 35 | O | 0.884565672 | 0.111083376  | 0.252390481 |
| 36 | O | 0.884490464 | 0.444532402  | 0.252451783 |
| 37 | O | 0.884466929 | 0.777667940  | 0.252451609 |
| 38 | O | 0.106742964 | 0.222181035  | 0.046913390 |
| 39 | O | 0.106767993 | 0.555545612  | 0.046887218 |
| 40 | O | 0.106750380 | 0.888926243  | 0.046927578 |
| 41 | O | 0.440052031 | 0.222103054  | 0.046893461 |
| 42 | O | 0.440028946 | 0.555588545  | 0.046933659 |
| 43 | O | 0.440164162 | 0.888914726  | 0.046896700 |
| 44 | O | 0.773404440 | 0.222241797  | 0.046949433 |

|    |   |             |             |             |
|----|---|-------------|-------------|-------------|
| 45 | O | 0.773532354 | 0.555653528 | 0.046876929 |
| 46 | O | 0.773394911 | 0.888869830 | 0.046894574 |
| 47 | H | 0.565724800 | 0.440385492 | 0.385287984 |
| 48 | H | 0.455071666 | 0.561180754 | 0.365499502 |
| 49 | H | 0.400052590 | 0.436026083 | 0.436042907 |
| 50 | H | 0.336061305 | 0.322744928 | 0.363113696 |

### CH<sub>4</sub>\_V<sub>2</sub>CO<sub>2</sub>\_Ov

Simulation cell vectors (Å):

|     |              |             |              |
|-----|--------------|-------------|--------------|
| a = | 8.612999916  | 0.000000000 | 0.000000000  |
| b = | -4.306499958 | 7.459076730 | 0.000000000  |
| c = | 0.000000000  | 0.000000000 | 21.443000794 |

Fractional coordinates:

| No. | Elements | X           | Y           | Z           |
|-----|----------|-------------|-------------|-------------|
| 1   | V        | 0.099324113 | 0.220291117 | 0.209475637 |
| 2   | V        | 0.094002498 | 0.547943155 | 0.210312952 |
| 3   | V        | 0.093931757 | 0.887175642 | 0.210251918 |
| 4   | V        | 0.420088503 | 0.200045062 | 0.205815518 |
| 5   | V        | 0.419899881 | 0.561198642 | 0.205839161 |
| 6   | V        | 0.432287344 | 0.886861812 | 0.210377801 |
| 7   | V        | 0.760652334 | 0.219854246 | 0.209505221 |
| 8   | V        | 0.781295300 | 0.561397130 | 0.205963872 |
| 9   | V        | 0.760774622 | 0.882141627 | 0.209480086 |
| 10  | V        | 0.206540336 | 0.110520698 | 0.096864467 |
| 11  | V        | 0.206602550 | 0.437526815 | 0.096851194 |
| 12  | V        | 0.206741348 | 0.774082898 | 0.099272039 |
| 13  | V        | 0.543998280 | 0.110256793 | 0.096860991 |
| 14  | V        | 0.540201253 | 0.440683718 | 0.100638849 |
| 15  | V        | 0.543944348 | 0.775150555 | 0.096919746 |
| 16  | V        | 0.873873212 | 0.107605367 | 0.100571254 |
| 17  | V        | 0.870746963 | 0.437439603 | 0.096904945 |
| 18  | V        | 0.870737937 | 0.774788140 | 0.096894634 |
| 19  | C        | 0.318089327 | 0.996415481 | 0.153561326 |
| 20  | C        | 0.318723285 | 0.330078259 | 0.155060162 |
| 21  | C        | 0.318016202 | 0.662992868 | 0.153583607 |

|    |   |             |             |             |
|----|---|-------------|-------------|-------------|
| 22 | C | 0.649843368 | 0.995651608 | 0.154178167 |
| 23 | C | 0.651192633 | 0.330035048 | 0.155081775 |
| 24 | C | 0.651154026 | 0.662422375 | 0.155067988 |
| 25 | C | 0.985531620 | 0.995691581 | 0.154156742 |
| 26 | C | 0.985539362 | 0.331236205 | 0.154175288 |
| 27 | C | 0.984743612 | 0.662966690 | 0.153599916 |
| 28 | C | 0.534978628 | 0.434867043 | 0.360914593 |
| 29 | O | 0.211157117 | 0.110519299 | 0.257695510 |
| 30 | O | 0.211348006 | 0.441951708 | 0.257758924 |
| 31 | O | 0.206870366 | 0.774103820 | 0.256116290 |
| 32 | O | 0.539119847 | 0.110728284 | 0.257768555 |
| 33 | O | 0.539255506 | 0.770077009 | 0.257727767 |
| 34 | O | 0.873844138 | 0.107605249 | 0.255436138 |
| 35 | O | 0.870257289 | 0.441812570 | 0.257730890 |
| 36 | O | 0.870310826 | 0.769813439 | 0.257735745 |
| 37 | O | 0.095552386 | 0.218530407 | 0.050145710 |
| 38 | O | 0.095339136 | 0.550909439 | 0.051509037 |
| 39 | O | 0.095386624 | 0.885817720 | 0.051508588 |
| 40 | O | 0.429531006 | 0.219124731 | 0.051431837 |
| 41 | O | 0.429583287 | 0.551752205 | 0.051474978 |
| 42 | O | 0.430006803 | 0.885652518 | 0.051498960 |
| 43 | O | 0.762767772 | 0.218444044 | 0.050162962 |
| 44 | O | 0.762092431 | 0.551687240 | 0.051460348 |
| 45 | O | 0.762721782 | 0.885616587 | 0.050160392 |
| 46 | H | 0.643411100 | 0.406970811 | 0.352410718 |
| 47 | H | 0.563313634 | 0.559278193 | 0.337845263 |
| 48 | H | 0.524430040 | 0.451245232 | 0.410851517 |
| 49 | H | 0.408179358 | 0.323672387 | 0.344452575 |

## CO<sub>2</sub>\_V<sub>2</sub>C

Simulation cell vectors (Å):

|     |              |             |              |
|-----|--------------|-------------|--------------|
| a = | 8.612000465  | 0.000000000 | 0.000000000  |
| b = | -4.306000233 | 7.458211180 | 0.000000000  |
| c = | 0.000000000  | 0.000000000 | 21.443000794 |

Fractional coordinates:

| No. | Elements | X            | Y           | Z           |
|-----|----------|--------------|-------------|-------------|
| 1   | V        | 0.116172441  | 0.229760426 | 0.103844819 |
| 2   | V        | 0.115129777  | 0.564159641 | 0.105810043 |
| 3   | V        | 0.113421122  | 0.897513290 | 0.104573613 |
| 4   | V        | 0.450599441  | 0.235941248 | 0.105352445 |
| 5   | V        | 0.453494538  | 0.556111502 | 0.107688123 |
| 6   | V        | 0.442591855  | 0.894915414 | 0.105198843 |
| 7   | V        | 0.767943590  | 0.238528398 | 0.105974342 |
| 8   | V        | 0.771820792  | 0.558061276 | 0.106321614 |
| 9   | V        | 0.775685052  | 0.889130936 | 0.103624797 |
| 10  | V        | 0.221722282  | 0.113890016 | 0.003551355 |
| 11  | V        | 0.220399545  | 0.451989078 | 0.004242534 |
| 12  | V        | 0.222946369  | 0.780861070 | 0.003620989 |
| 13  | V        | 0.553895528  | 0.109926484 | 0.002772596 |
| 14  | V        | 0.553147180  | 0.453078366 | 1.000356570 |
| 15  | V        | 0.553054479  | 0.785538556 | 0.004295804 |
| 16  | V        | 0.888540006  | 0.119291727 | 0.005312838 |
| 17  | V        | 0.899221596  | 0.454746663 | 0.003461210 |
| 18  | V        | 0.894477032  | 0.785064259 | 0.003746640 |
| 19  | C        | -0.000212728 | 0.006524926 | 0.054053045 |
| 20  | C        | -0.001497072 | 0.339276998 | 0.056836001 |
| 21  | C        | 0.001666259  | 0.673103749 | 0.055718840 |
| 22  | C        | 0.333422943  | 0.004480300 | 0.053756147 |
| 23  | C        | 0.335382765  | 0.340430858 | 0.051135158 |
| 24  | C        | 0.336293746  | 0.671475012 | 0.056652386 |
| 25  | C        | 0.667232953  | 0.007625984 | 0.056262202 |
| 26  | C        | 0.666160421  | 0.342120304 | 0.045465666 |
| 27  | C        | 0.666631014  | 0.672231499 | 0.050164552 |
| 28  | C        | 0.556354442  | 0.421294434 | 0.170951291 |
| 29  | O        | 0.684896476  | 0.355037189 | 0.171382126 |
| 30  | O        | 0.628235380  | 0.588670527 | 0.187839663 |

### CO<sub>2</sub>\_V<sub>2</sub>CO<sub>2</sub>

Simulation cell vectors (Å):

|     |              |             |              |
|-----|--------------|-------------|--------------|
| a = | 8.612999916  | 0.000000000 | 0.000000000  |
| b = | -4.306499958 | 7.459076730 | 0.000000000  |
| c = | 0.000000000  | 0.000000000 | 21.443000794 |

Fractional coordinates

| No. | Elements | X           | Y           | Z           |
|-----|----------|-------------|-------------|-------------|
| 1   | V        | 0.109655946 | 0.227967191 | 0.205447939 |
| 2   | V        | 0.109722820 | 0.561104723 | 0.205790930 |
| 3   | V        | 0.109953081 | 0.895209408 | 0.205627636 |
| 4   | V        | 0.442925314 | 0.228097858 | 0.205733896 |
| 5   | V        | 0.443104988 | 0.561960764 | 0.205210610 |
| 6   | V        | 0.443161370 | 0.894969380 | 0.205704436 |
| 7   | V        | 0.776342954 | 0.228249071 | 0.205555676 |
| 8   | V        | 0.776646879 | 0.561452205 | 0.205652880 |
| 9   | V        | 0.776256899 | 0.894528342 | 0.205672293 |
| 10  | V        | 0.220949675 | 0.117179156 | 0.093905806 |
| 11  | V        | 0.220659629 | 0.450229808 | 0.093808946 |
| 12  | V        | 0.220763080 | 0.783446503 | 0.094231823 |
| 13  | V        | 0.553966073 | 0.117056603 | 0.093916498 |
| 14  | V        | 0.554501753 | 0.450556657 | 0.094003008 |
| 15  | V        | 0.554241214 | 0.783950839 | 0.093818829 |
| 16  | V        | 0.887517345 | 0.117143587 | 0.093939618 |
| 17  | V        | 0.887738123 | 0.450457545 | 0.093988914 |
| 18  | V        | 0.887474307 | 0.783588956 | 0.093911705 |
| 19  | C        | 0.332089390 | 0.006178481 | 0.149790191 |
| 20  | C        | 0.331896575 | 0.339307728 | 0.149740479 |
| 21  | C        | 0.331883891 | 0.672395104 | 0.149708445 |
| 22  | C        | 0.665356114 | 0.005934492 | 0.149772299 |
| 23  | C        | 0.665350192 | 0.339327806 | 0.149814369 |
| 24  | C        | 0.665541777 | 0.672808106 | 0.149716852 |
| 25  | C        | 0.998420441 | 0.005860812 | 0.149723633 |
| 26  | C        | 0.998716680 | 0.339295020 | 0.149755351 |
| 27  | C        | 0.998455071 | 0.672376989 | 0.149833795 |
| 28  | C        | 0.428767075 | 0.455698017 | 0.379327110 |
| 29  | O        | 0.220858480 | 0.117320083 | 0.252563025 |
| 30  | O        | 0.220980119 | 0.449734621 | 0.252629437 |
| 31  | O        | 0.220707297 | 0.783495904 | 0.252460499 |
| 32  | O        | 0.554414971 | 0.117314002 | 0.252470727 |
| 33  | O        | 0.554440451 | 0.450969130 | 0.252571680 |
| 34  | O        | 0.554721344 | 0.784159744 | 0.252266639 |
| 35  | O        | 0.887531364 | 0.116953621 | 0.252390333 |
| 36  | O        | 0.887287315 | 0.450288913 | 0.252556074 |

|    |   |             |             |             |
|----|---|-------------|-------------|-------------|
| 37 | O | 0.887339890 | 0.783499665 | 0.252562303 |
| 38 | O | 0.109893804 | 0.228141240 | 0.046953651 |
| 39 | O | 0.109846139 | 0.561637449 | 0.046993007 |
| 40 | O | 0.109868979 | 0.894955797 | 0.047112245 |
| 41 | O | 0.443018938 | 0.228112115 | 0.046986542 |
| 42 | O | 0.442924462 | 0.561496418 | 0.046954209 |
| 43 | O | 0.442806960 | 0.894725208 | 0.046997447 |
| 44 | O | 0.776383621 | 0.228103617 | 0.047066872 |
| 45 | O | 0.776550371 | 0.561397263 | 0.046959509 |
| 46 | O | 0.776510724 | 0.894751022 | 0.046947296 |
| 47 | O | 0.416402183 | 0.314991658 | 0.382546780 |
| 48 | O | 0.440919615 | 0.596460419 | 0.376443132 |

### CO<sub>2</sub>\_V<sub>2</sub>CO<sub>2</sub>\_Ov

Simulation cell vectors (Å):

|     |              |             |              |
|-----|--------------|-------------|--------------|
| a = | 8.612999916  | 0.000000000 | 0.000000000  |
| b = | -4.306499958 | 7.459076730 | 0.000000000  |
| c = | 0.000000000  | 0.000000000 | 21.443000794 |

Fractional coordinates

| No. | Elements | X           | Y           | Z           |
|-----|----------|-------------|-------------|-------------|
| 1   | V        | 0.107575830 | 0.221219083 | 0.209677090 |
| 2   | V        | 0.100918780 | 0.545955267 | 0.211915762 |
| 3   | V        | 0.100606898 | 0.889384256 | 0.212023898 |
| 4   | V        | 0.424914922 | 0.193693427 | 0.207082795 |
| 5   | V        | 0.425082597 | 0.565384313 | 0.206833874 |
| 6   | V        | 0.445113321 | 0.889598349 | 0.212050049 |
| 7   | V        | 0.769878610 | 0.221238738 | 0.209638555 |
| 8   | V        | 0.796157750 | 0.565311605 | 0.206595638 |
| 9   | V        | 0.770058877 | 0.883719530 | 0.209526252 |
| 10  | V        | 0.215257835 | 0.110810640 | 0.097201203 |
| 11  | V        | 0.215508583 | 0.439458523 | 0.097189335 |
| 12  | V        | 0.215760026 | 0.775207817 | 0.101354949 |
| 13  | V        | 0.551712850 | 0.110893197 | 0.097141783 |
| 14  | V        | 0.548720424 | 0.441433118 | 0.103247714 |



|    |   |             |             |             |
|----|---|-------------|-------------|-------------|
| 15 | V | 0.551558654 | 0.775461777 | 0.097126028 |
| 16 | V | 0.882394679 | 0.108622628 | 0.101700066 |
| 17 | V | 0.880222103 | 0.439568083 | 0.097157023 |
| 18 | V | 0.880152943 | 0.775470719 | 0.097073640 |
| 19 | C | 0.325840026 | 0.995454001 | 0.154323208 |
| 20 | C | 0.328326630 | 0.331399293 | 0.157158346 |
| 21 | C | 0.325847335 | 0.665100254 | 0.154238026 |
| 22 | C | 0.658504300 | 0.996638939 | 0.155049425 |
| 23 | C | 0.659163684 | 0.331255816 | 0.157083609 |
| 24 | C | 0.659398896 | 0.662708892 | 0.156978518 |
| 25 | C | 0.994294647 | 0.996610054 | 0.155049557 |
| 26 | C | 0.994282236 | 0.332395170 | 0.155061987 |
| 27 | C | 0.995497764 | 0.665157175 | 0.154156209 |
| 28 | C | 0.575943242 | 0.474740185 | 0.336813169 |
| 29 | O | 0.218061726 | 0.109198591 | 0.259548297 |
| 30 | O | 0.218168310 | 0.443726076 | 0.259573911 |
| 31 | O | 0.215725230 | 0.775222002 | 0.256111656 |
| 32 | O | 0.547384300 | 0.109329143 | 0.259598055 |
| 33 | O | 0.547416110 | 0.772386485 | 0.259678348 |
| 34 | O | 0.882215110 | 0.108395669 | 0.256327299 |
| 35 | O | 0.881403600 | 0.443825764 | 0.259610488 |
| 36 | O | 0.881102970 | 0.772156802 | 0.259712061 |
| 37 | O | 0.10464086  | 0.219759517 | 0.051544204 |
| 38 | O | 0.10414268  | 0.552073947 | 0.052185415 |
| 39 | O | 0.10424917  | 0.886837838 | 0.052202874 |
| 40 | O | 0.43851678  | 0.220977133 | 0.052463271 |
| 41 | O | 0.43868066  | 0.552174101 | 0.052481584 |
| 42 | O | 0.43884658  | 0.886787048 | 0.052212428 |
| 43 | O | 0.77127670  | 0.219715281 | 0.051533042 |
| 44 | O | 0.76955913  | 0.552107402 | 0.052463929 |
| 45 | O | 0.77131524  | 0.886394437 | 0.051518069 |
| 46 | O | 0.55198365  | 0.446137476 | 0.282647733 |
| 47 | O | 0.59839240  | 0.501375535 | 0.389353746 |

## H<sub>2</sub>\_V<sub>2</sub>C

Simulation cell vectors (Å):

a =       8.612999916       0.000000000       0.000000000

|     |              |             |              |
|-----|--------------|-------------|--------------|
| b = | -4.306499958 | 7.459076730 | 0.000000000  |
| c = | 0.000000000  | 0.000000000 | 21.443000794 |

Fractional coordinates

| No. | Elements | X           | Y            | Z           |
|-----|----------|-------------|--------------|-------------|
| 1   | V        | 0.116210923 | 0.220855884  | 0.104302963 |
| 2   | V        | 0.113955495 | 0.554510171  | 0.104126356 |
| 3   | V        | 0.114517036 | 0.886400665  | 0.103837528 |
| 4   | V        | 0.445542524 | 0.219314731  | 0.103622648 |
| 5   | V        | 0.447629364 | 0.552853057  | 0.104135842 |
| 6   | V        | 0.445699965 | 0.887015806  | 0.103802206 |
| 7   | V        | 0.779514394 | 0.219861634  | 0.104300496 |
| 8   | V        | 0.779187872 | 0.554517226  | 0.103884323 |
| 9   | V        | 0.778458637 | 0.883244632  | 0.104226749 |
| 10  | V        | 0.222818864 | 0.107531210  | 0.002080764 |
| 11  | V        | 0.222362776 | 0.441699801  | 0.002332686 |
| 12  | V        | 0.224127227 | 0.774694403  | 0.002116389 |
| 13  | V        | 0.559180801 | 0.109150306  | 0.002324928 |
| 14  | V        | 0.558581631 | 0.440749498  | 0.001950224 |
| 15  | V        | 0.557765040 | 0.777315172  | 0.002222049 |
| 16  | V        | 0.891501710 | 0.108996168  | 0.003038986 |
| 17  | V        | 0.89134065  | 0.441307860  | 0.002686142 |
| 18  | V        | 0.89325525  | 0.776981011  | 0.002127332 |
| 19  | C        | 0.00205513  | -0.002534019 | 0.054058103 |
| 20  | C        | 0.00244838  | 0.330864054  | 0.054338413 |
| 21  | C        | 0.00186226  | 0.664157765  | 0.053223354 |
| 22  | C        | 0.33567674  | -0.002197397 | 0.052496422 |
| 23  | C        | 0.33565220  | 0.330760459  | 0.051962680 |
| 24  | C        | 0.33583046  | 0.664244682  | 0.053050236 |
| 25  | C        | 0.66919563  | -0.002524670 | 0.054011882 |
| 26  | C        | 0.66900801  | 0.331160886  | 0.053746711 |
| 27  | C        | 0.66943317  | 0.664504812  | 0.051501936 |
| 28  | H        | 0.38349170  | 0.510167706  | 0.183644893 |
| 29  | H        | 0.49692075  | 0.597604229  | 0.184605501 |

**H<sub>2</sub>\_V<sub>2</sub>CO<sub>2</sub>**

Simulation cell vectors (Å):

|     |              |             |              |
|-----|--------------|-------------|--------------|
| a = | 8.612999916  | 0.000000000 | 0.000000000  |
| b = | -4.306499958 | 7.459076730 | 0.000000000  |
| c = | 0.000000000  | 0.000000000 | 21.443000794 |

Fractional coordinates

| No. | Elements | X            | Y            | Z            |
|-----|----------|--------------|--------------|--------------|
| 1   | V        | 0.1065497303 | 0.2232736564 | 0.2058053799 |
| 2   | V        | 0.1065660588 | 0.5565389400 | 0.2058187309 |
| 3   | V        | 0.1065863467 | 0.8899316987 | 0.2058369115 |
| 4   | V        | 0.4399222265 | 0.2232873362 | 0.2058086479 |
| 5   | V        | 0.4398537096 | 0.5565664618 | 0.2058524608 |
| 6   | V        | 0.4397798287 | 0.8899495842 | 0.2057635112 |
| 7   | V        | 0.7732349161 | 0.2232262156 | 0.2058273763 |
| 8   | V        | 0.7733089032 | 0.5566010510 | 0.2058249402 |
| 9   | V        | 0.7732642595 | 0.8899390623 | 0.2057727014 |
| 10  | V        | 0.2176990551 | 0.1121142180 | 0.0941432207 |
| 11  | V        | 0.2177314160 | 0.4454602827 | 0.0941875101 |
| 12  | V        | 0.2176082391 | 0.7787703202 | 0.0941449539 |
| 13  | V        | 0.5509939207 | 0.1121101260 | 0.0941398044 |
| 14  | V        | 0.5510490483 | 0.4455633941 | 0.0941641234 |
| 15  | V        | 0.5510221938 | 0.7787825714 | 0.0941838944 |
| 16  | V        | 0.8843303836 | 0.1120734140 | 0.0941698775 |
| 17  | V        | 0.8842779707 | 0.4454024701 | 0.0941915466 |
| 18  | V        | 0.8842915133 | 0.7787936249 | 0.0941837673 |
| 19  | C        | 0.3287420600 | 0.0010318592 | 0.1499609757 |
| 20  | C        | 0.3288014123 | 0.3343535206 | 0.1499834560 |
| 21  | C        | 0.3287790036 | 0.6676912309 | 0.1499841108 |
| 22  | C        | 0.6621025983 | 0.0010389985 | 0.1499659971 |
| 23  | C        | 0.6621067007 | 0.3343343577 | 0.1499959341 |
| 24  | C        | 0.6620963163 | 0.6676779586 | 0.1499977280 |
| 25  | C        | 0.9955021369 | 0.0010388028 | 0.1499819794 |
| 26  | C        | 0.9954331424 | 0.3343403363 | 0.1500080394 |
| 27  | C        | 0.9954686431 | 0.6676938123 | 0.1500091868 |
| 28  | O        | 0.2177275331 | 0.1121791589 | 0.2527567102 |
| 29  | O        | 0.2176156910 | 0.4454132355 | 0.2527518227 |
| 30  | O        | 0.2176933237 | 0.7787952638 | 0.2527759121 |
| 31  | O        | 0.5509953931 | 0.1121133913 | 0.2527673728 |
| 32  | O        | 0.5510339188 | 0.4453200765 | 0.2527042717 |

|    |   |              |              |              |
|----|---|--------------|--------------|--------------|
| 33 | O | 0.5510841182 | 0.7790751607 | 0.2526821204 |
| 34 | O | 0.8843087282 | 0.1121054112 | 0.2527594092 |
| 35 | O | 0.8843171551 | 0.4454421028 | 0.2527441398 |
| 36 | O | 0.8843142519 | 0.7788266757 | 0.2527692480 |
| 37 | O | 0.1065713342 | 0.2232522973 | 0.0472416260 |
| 38 | O | 0.1065410790 | 0.5565620073 | 0.0472561503 |
| 39 | O | 0.1065499201 | 0.8899161222 | 0.0472274387 |
| 40 | O | 0.4399026334 | 0.2232805813 | 0.0472276771 |
| 41 | O | 0.4398509216 | 0.5565324341 | 0.0472390684 |
| 42 | O | 0.4398491185 | 0.8898985111 | 0.0472279222 |
| 43 | O | 0.7732202812 | 0.2232388158 | 0.0472443487 |
| 44 | O | 0.7732701693 | 0.5565791396 | 0.0472472825 |
| 45 | O | 0.7732366387 | 0.8899124804 | 0.0472293311 |
| 46 | H | 0.4875357537 | 0.6301696451 | 0.3705652443 |
| 47 | H | 0.4567132237 | 0.5336558022 | 0.3754686958 |

## H<sub>2</sub>\_V<sub>2</sub>CO<sub>2</sub>\_Ov

Simulation cell vectors (Å):

|     |              |             |              |
|-----|--------------|-------------|--------------|
| a = | 8.612999916  | 0.000000000 | 0.000000000  |
| b = | -4.306499958 | 7.459076730 | 0.000000000  |
| c = | 0.000000000  | 0.000000000 | 21.443000794 |

Fractional coordinates

| No. | Elements | X           | Y           | Z           |
|-----|----------|-------------|-------------|-------------|
| 1   | V        | 0.106079615 | 0.222706796 | 0.209533107 |
| 2   | V        | 0.100948455 | 0.550491873 | 0.210555955 |
| 3   | V        | 0.100921105 | 0.889749638 | 0.210525026 |
| 4   | V        | 0.426930091 | 0.202374834 | 0.205842027 |
| 5   | V        | 0.426902087 | 0.563682591 | 0.205697076 |
| 6   | V        | 0.439801481 | 0.889493968 | 0.210556967 |
| 7   | V        | 0.767897475 | 0.222452896 | 0.209495336 |
| 8   | V        | 0.788301370 | 0.563748814 | 0.205825069 |
| 9   | V        | 0.767692890 | 0.884400510 | 0.209584791 |
| 10  | V        | 0.213510245 | 0.112705716 | 0.096944103 |
| 11  | V        | 0.213309579 | 0.439642428 | 0.096880150 |
| 12  | V        | 0.213877678 | 0.776449121 | 0.099354993 |
| 13  | V        | 0.550809949 | 0.112551192 | 0.096928846 |
| 14  | V        | 0.547263504 | 0.443325015 | 0.100603497 |
| 15  | V        | 0.550980663 | 0.777347578 | 0.096897012 |
| 16  | V        | 0.880733247 | 0.109883937 | 0.100643648 |
| 17  | V        | 0.877864232 | 0.439623885 | 0.096941125 |
| 18  | V        | 0.877867248 | 0.777088043 | 0.096899081 |
| 19  | C        | 0.324995357 | 0.998651624 | 0.153692042 |
| 20  | C        | 0.325669142 | 0.332384788 | 0.155062222 |
| 21  | C        | 0.324986756 | 0.665481078 | 0.153656783 |
| 22  | C        | 0.656827134 | 0.997885583 | 0.154249949 |
| 23  | C        | 0.658069183 | 0.332413279 | 0.155063953 |
| 24  | C        | 0.658234925 | 0.664883206 | 0.155062756 |
| 25  | C        | 0.992504219 | 0.997924863 | 0.154254013 |
| 26  | C        | 0.992577685 | 0.333646487 | 0.154248163 |
| 27  | C        | 0.991944694 | 0.665558910 | 0.153681398 |
| 28  | O        | 0.218581502 | 0.113408969 | 0.257780455 |
| 29  | O        | 0.218854914 | 0.444388645 | 0.257862422 |

|    |   |             |             |             |
|----|---|-------------|-------------|-------------|
| 30 | O | 0.213926357 | 0.776516691 | 0.256249392 |
| 31 | O | 0.546224503 | 0.113277041 | 0.257833241 |
| 32 | O | 0.546059573 | 0.771551467 | 0.257842090 |
| 33 | O | 0.880696491 | 0.109870676 | 0.255484272 |
| 34 | O | 0.876828402 | 0.444193670 | 0.257844407 |
| 35 | O | 0.877146482 | 0.771878300 | 0.257798135 |
| 36 | O | 0.102479803 | 0.220737693 | 0.050198923 |
| 37 | O | 0.102399500 | 0.553455480 | 0.051559058 |
| 38 | O | 0.102461734 | 0.888150090 | 0.051567364 |
| 39 | O | 0.436440760 | 0.221454486 | 0.051489711 |
| 40 | O | 0.436426775 | 0.554166788 | 0.051442569 |
| 41 | O | 0.437021381 | 0.888031965 | 0.051571724 |
| 42 | O | 0.769678048 | 0.220763086 | 0.050226925 |
| 43 | O | 0.769128833 | 0.554078672 | 0.051470346 |
| 44 | O | 0.769826708 | 0.888047114 | 0.050217480 |
| 45 | H | 0.510444971 | 0.437499798 | 0.336311851 |
| 46 | H | 0.579164882 | 0.408858910 | 0.336121695 |

## H<sub>2</sub>O\_V<sub>2</sub>C

Simulation cell vectors (Å):

|     |              |             |              |
|-----|--------------|-------------|--------------|
| a = | 8.612999916  | 0.000000000 | 0.000000000  |
| b = | -4.306499958 | 7.459076730 | 0.000000000  |
| c = | 0.000000000  | 0.000000000 | 21.443000794 |

Fractional coordinates

| No. | Elements | X           | Y           | Z           |
|-----|----------|-------------|-------------|-------------|
| 1   | V        | 0.104838435 | 0.219074794 | 0.102713642 |
| 2   | V        | 0.104146185 | 0.553475423 | 0.102933008 |
| 3   | V        | 0.108607195 | 0.889434974 | 0.102411261 |
| 4   | V        | 0.442467203 | 0.219188546 | 0.103150423 |
| 5   | V        | 0.440792959 | 0.553733960 | 0.108144598 |
| 6   | V        | 0.442128802 | 0.892711234 | 0.103393583 |
| 7   | V        | 0.777461470 | 0.223739261 | 0.103527792 |
| 8   | V        | 0.780379022 | 0.554818884 | 0.103361234 |
| 9   | V        | 0.781445146 | 0.893893330 | 0.103806267 |
| 10  | V        | 0.222826962 | 0.115298926 | 1.001099702 |

|    |   |              |              |             |
|----|---|--------------|--------------|-------------|
| 11 | V | 0.224417694  | 0.446751088  | 0.002811459 |
| 12 | V | 0.222452990  | 0.775948099  | 1.001850281 |
| 13 | V | 0.555932213  | 0.112261540  | 1.001386954 |
| 14 | V | 0.553131142  | 0.447281921  | 0.003295513 |
| 15 | V | 0.553203574  | 0.774899962  | 0.003656868 |
| 16 | V | 0.884575466  | 0.110805679  | 1.001064663 |
| 17 | V | 0.885106152  | 0.443036941  | 1.000848561 |
| 18 | V | 0.881241296  | 0.774705022  | 1.001580179 |
| 19 | C | -0.001352026 | -0.000158988 | 0.050201856 |
| 20 | C | -0.001770600 | 0.333540983  | 0.051158260 |
| 21 | C | -0.001407664 | 0.667505182  | 0.050862255 |
| 22 | C | 0.330809227  | -0.000093587 | 0.050920231 |
| 23 | C | 0.331810442  | 0.334106668  | 0.054561736 |
| 24 | C | 0.331983547  | 0.666205769  | 0.055225450 |
| 25 | C | 0.664427758  | -0.000259586 | 0.052964170 |
| 26 | C | 0.664465878  | 0.333419737  | 0.052500302 |
| 27 | C | 0.663474672  | 0.666035742  | 0.056335725 |
| 28 | O | 0.440939799  | 0.553479557  | 0.208296259 |
| 29 | H | 0.506385469  | 0.493678070  | 0.220797310 |
| 30 | H | 0.316838285  | 0.477646236  | 0.220962238 |

## H<sub>2</sub>O\_V<sub>2</sub>CO<sub>2</sub>

Simulation cell vectors (Å):

|     |              |             |              |
|-----|--------------|-------------|--------------|
| a = | 8.612999916  | 0.000000000 | 0.000000000  |
| b = | -4.306499958 | 7.459076730 | 0.000000000  |
| c = | 0.000000000  | 0.000000000 | 21.443000794 |

Fractional coordinates

| No. | Elements | X           | Y           | Z           |
|-----|----------|-------------|-------------|-------------|
| 1   | V        | 0.108956607 | 0.229326436 | 0.206360903 |
| 2   | V        | 0.108342377 | 0.561874740 | 0.206229464 |
| 3   | V        | 0.108693996 | 0.896109955 | 0.206521464 |
| 4   | V        | 0.441403303 | 0.227771032 | 0.206225946 |
| 5   | V        | 0.441639933 | 0.562733113 | 0.206185692 |
| 6   | V        | 0.442636238 | 0.896222634 | 0.206569407 |
| 7   | V        | 0.775486965 | 0.229411267 | 0.206102789 |

|    |   |             |             |             |
|----|---|-------------|-------------|-------------|
| 8  | V | 0.776095165 | 0.562900837 | 0.205934406 |
| 9  | V | 0.775562950 | 0.895662494 | 0.206151051 |
| 10 | V | 0.219771549 | 0.118071200 | 0.094509263 |
| 11 | V | 0.220076827 | 0.451419328 | 0.094505078 |
| 12 | V | 0.220119987 | 0.784815160 | 0.094863793 |
| 13 | V | 0.553236213 | 0.117856704 | 0.094495425 |
| 14 | V | 0.553240026 | 0.451434596 | 0.094899449 |
| 15 | V | 0.553172928 | 0.784490135 | 0.094574966 |
| 16 | V | 0.886497705 | 0.118067873 | 0.094653617 |
| 17 | V | 0.886377589 | 0.451418623 | 0.094488449 |
| 18 | V | 0.886671695 | 0.784499208 | 0.094474669 |
| 19 | C | 0.330984152 | 0.006803645 | 0.150494399 |
| 20 | C | 0.330844493 | 0.340163232 | 0.150509920 |
| 21 | C | 0.331138581 | 0.673666601 | 0.150497522 |
| 22 | C | 0.664175635 | 0.006818025 | 0.150433484 |
| 23 | C | 0.664262592 | 0.340065114 | 0.150432396 |
| 24 | C | 0.664394276 | 0.673723460 | 0.150408064 |
| 25 | C | 0.997741992 | 0.006850699 | 0.150417654 |
| 26 | C | 0.997745432 | 0.340296627 | 0.150387244 |
| 27 | C | 0.997701054 | 0.673679957 | 0.150416633 |
| 28 | O | 0.219210480 | 0.117784663 | 0.252922166 |
| 29 | O | 0.220000016 | 0.451324145 | 0.253265072 |
| 30 | O | 0.219867147 | 0.784618426 | 0.253061918 |
| 31 | O | 0.553789370 | 0.118241469 | 0.253314322 |
| 32 | O | 0.553893911 | 0.452026926 | 0.253390319 |
| 33 | O | 0.553359271 | 0.784628124 | 0.253299520 |
| 34 | O | 0.886487379 | 0.118093690 | 0.253020660 |
| 35 | O | 0.886158151 | 0.451280176 | 0.253287129 |
| 36 | O | 0.886447600 | 0.784421334 | 0.253259360 |
| 37 | O | 0.108912843 | 0.229183064 | 0.047657496 |
| 38 | O | 0.108760095 | 0.562366434 | 0.047781538 |
| 39 | O | 0.108727333 | 0.895778763 | 0.047708591 |
| 40 | O | 0.442093749 | 0.229049069 | 0.047777111 |
| 41 | O | 0.442040782 | 0.562470115 | 0.047676591 |
| 42 | O | 0.442264745 | 0.895726552 | 0.047681787 |
| 43 | O | 0.775307059 | 0.229099687 | 0.047644787 |
| 44 | O | 0.775453433 | 0.562507569 | 0.047632123 |
| 45 | O | 0.775425027 | 0.895627012 | 0.047730616 |
| 46 | O | 0.427521545 | 0.280225192 | 0.374216591 |



|    |   |             |             |             |
|----|---|-------------|-------------|-------------|
| 47 | H | 0.503285202 | 0.373898281 | 0.345393626 |
| 48 | H | 0.507989517 | 0.261303868 | 0.400102777 |

### H<sub>2</sub>O\_V<sub>2</sub>CO<sub>2</sub>\_Ov

Simulation cell vectors (Å):

|     |              |             |              |
|-----|--------------|-------------|--------------|
| a = | 8.612999916  | 0.000000000 | 0.000000000  |
| b = | -4.306499958 | 7.459076730 | 0.000000000  |
| c = | 0.000000000  | 0.000000000 | 21.443000794 |

Fractional coordinates

| No. | Elements | X           | Y            | Z           |
|-----|----------|-------------|--------------|-------------|
| 1   | V        | 0.104888734 | 0.220630471  | 0.210061314 |
| 2   | V        | 0.096083255 | 0.545380522  | 0.212270094 |
| 3   | V        | 0.096181361 | 0.887104573  | 0.212207184 |
| 4   | V        | 0.420959182 | 0.194613635  | 0.206817347 |
| 5   | V        | 0.420762396 | 0.562733227  | 0.206431979 |
| 6   | V        | 0.441575630 | 0.889014952  | 0.213375194 |
| 7   | V        | 0.766803930 | 0.218834546  | 0.209487364 |
| 8   | V        | 0.789177683 | 0.562748783  | 0.208590234 |
| 9   | V        | 0.766490049 | 0.883570226  | 0.209622036 |
| 10  | V        | 0.212614615 | 0.109815536  | 0.097480504 |
| 11  | V        | 0.212272952 | 0.438450100  | 0.097184707 |
| 12  | V        | 0.211897596 | 0.774235522  | 0.101903352 |
| 13  | V        | 0.550471165 | 0.110805041  | 0.097175982 |
| 14  | V        | 0.544725478 | 0.440477718  | 0.103372047 |
| 15  | V        | 0.550667901 | 0.776010767  | 0.097082329 |
| 16  | V        | 0.879198706 | 0.107569033  | 0.101787100 |
| 17  | V        | 0.878121871 | 0.440932240  | 0.098402774 |
| 18  | V        | 0.878081151 | 0.773013754  | 0.098462931 |
| 19  | C        | 0.323596490 | -0.004881203 | 0.154843004 |
| 20  | C        | 0.324601522 | 0.330457251  | 0.156944049 |
| 21  | C        | 0.323477891 | 0.664593743  | 0.154719177 |
| 22  | C        | 0.654927187 | -0.004526463 | 0.155350009 |
| 23  | C        | 0.656031700 | 0.330273670  | 0.157269480 |
| 24  | C        | 0.655973902 | 0.661838042  | 0.157237394 |
| 25  | C        | 0.991102149 | -0.004257339 | 0.155381316 |

|    |   |             |             |             |
|----|---|-------------|-------------|-------------|
| 26 | C | 0.991245158 | 0.331561370 | 0.155312385 |
| 27 | C | 0.992592615 | 0.664333638 | 0.155082160 |
| 28 | O | 0.215349032 | 0.108726227 | 0.259505978 |
| 29 | O | 0.215817082 | 0.443034461 | 0.259446867 |
| 30 | O | 0.212664815 | 0.774363641 | 0.256868658 |
| 31 | O | 0.544928307 | 0.112445011 | 0.260359048 |
| 32 | O | 0.544543091 | 0.767817397 | 0.260282505 |
| 33 | O | 0.878982897 | 0.107500268 | 0.256746111 |
| 34 | O | 0.879894339 | 0.441300661 | 0.260220259 |
| 35 | O | 0.879760379 | 0.774452096 | 0.260218030 |
| 36 | O | 0.101385254 | 0.218584290 | 0.051772833 |
| 37 | O | 0.101090690 | 0.551722033 | 0.052581684 |
| 38 | O | 0.101070038 | 0.885683536 | 0.052594138 |
| 39 | O | 0.435662786 | 0.219877340 | 0.052638836 |
| 40 | O | 0.435730367 | 0.551988544 | 0.052580241 |
| 41 | O | 0.435371880 | 0.885791571 | 0.052880801 |
| 42 | O | 0.769149282 | 0.220048998 | 0.051964885 |
| 43 | O | 0.766329411 | 0.551195718 | 0.053076045 |
| 44 | O | 0.769322899 | 0.885150788 | 0.051948173 |
| 45 | O | 0.575053250 | 0.452490684 | 0.284757978 |
| 46 | H | 0.588249044 | 0.551144383 | 0.310811993 |
| 47 | H | 0.598516469 | 0.372463345 | 0.310156668 |

## S2. Adsorption configurations at high vacancy regime

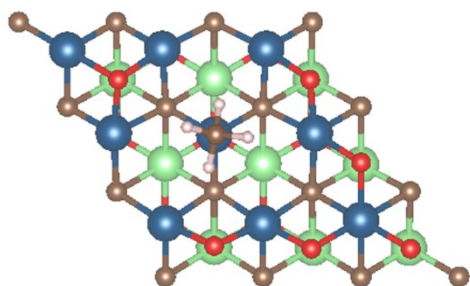

CH<sub>4</sub> top view

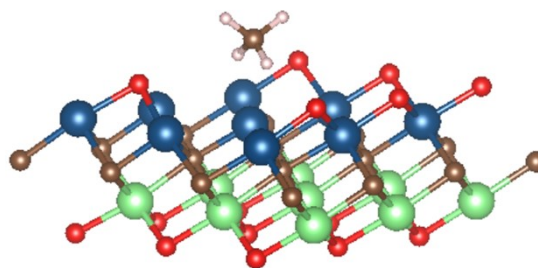

CH<sub>4</sub> side view

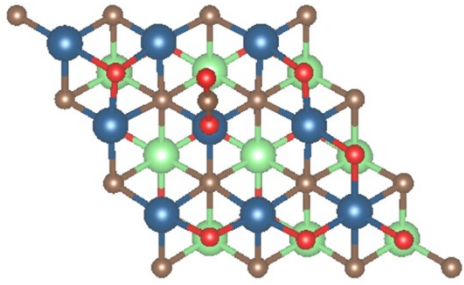

CO<sub>2</sub> top view

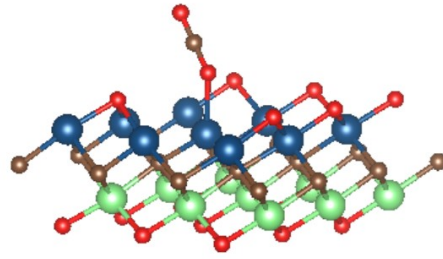

CO<sub>2</sub> top view

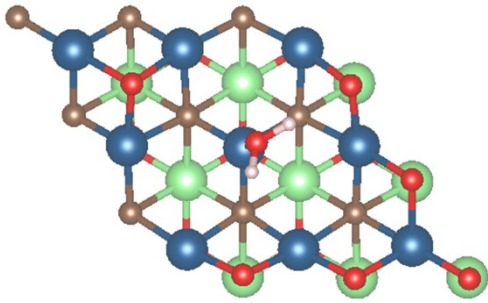

H<sub>2</sub>O top view

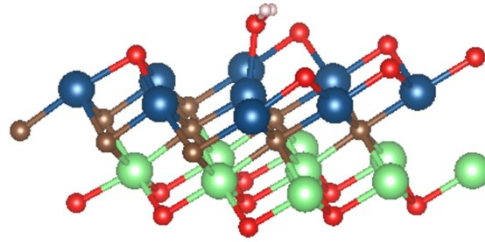

H<sub>2</sub>O side view
